# Supplementary material for: Patterns and Predictors of HIV Comorbidity among Adolescents and Young Adults in South Africa
Source: MDPI journal article supplement (doi:10.3390/ijerph21040457), 2024-04-09
Supplement: s1 [file s1]

**Table S1. Description of sample population by sex (unweighted)**

|                             | <b>Total % (n)<br/>N=2723</b> | <b>Male % (n)<br/>n=1307</b> | <b>Female % (n)<br/>n=1416</b> | <b>p-Value</b> |
|-----------------------------|-------------------------------|------------------------------|--------------------------------|----------------|
| Age* (Median years and IQR) | 19 (17–22)                    | 19 (17–22)                   | 19 (17–22)                     | 0.22           |
| Urban location              | 49.9 (1 360)                  | 47.1 (616)                   | 52.5 (744)                     | 0.005          |
| Province:                   |                               |                              |                                | 0.110          |
| – Western Cape              | 5.5 (149)                     | 4.8 (63)                     | 6.1 (86)                       |                |
| – Eastern Cape              | 13.6 (371)                    | 14.9 (195)                   | 12.4 (176)                     |                |
| – Northern Cape             | 7.3 (200)                     | 6.6 (86)                     | 8.1 (114)                      |                |
| – Free State                | 9.9 (270)                     | 10.7 (140)                   | 9.2 (130)                      |                |
| – Kwa-Zulu Natal            | 18 (489)                      | 17.1 (223)                   | 18.8 (266)                     |                |
| – North West                | 8.9 (242)                     | 9.8 (128)                    | 8.1 (114)                      |                |
| – Gauteng                   | 8.5 (231)                     | 8 (104)                      | 9 (127)                        |                |
| – Mpumalanga                | 12.4 (338)                    | 12.2 (159)                   | 12.6 (179)                     |                |
| – Limpopo                   | 15.9 (433)                    | 16 (209)                     | 15.8 (224)                     |                |
| Education level             |                               |                              |                                | <0.001         |
| – Primary or less           | 10.4 (283)                    | 13.9 (181)                   | 7.2 (102)                      |                |
| – Secondary complete        | 84.1 (2289)                   | 81.9 (1071)                  | 86 (1218)                      |                |
| – Tertiary                  | 5.6 (151)                     | 4.2 (55)                     | 6.8 (96)                       |                |
| Employed                    | 13.2 (358)                    | 17.6 (230)                   | 9.0 (128)                      |                |
| Wealth index                |                               |                              |                                | <b>0.185</b>   |
| – Quintile 1 (Poorest)      | 23.3 (634)                    | 23 (301)                     | 23.5 (333)                     |                |
| – Quintile 2 (Poorer)       | 23.5 (640)                    | 24.9 (326)                   | 22.2 (314)                     |                |
| – Quintile 3 (Middle)       | 23.1 (630)                    | 23.9 (312)                   | 22.5 (318)                     |                |
| – Quintile 4 (Richer)       | 19.8 (540)                    | 18.8 (246)                   | 20.8 (294)                     |                |
| – Quintile 5 (Richest)      | 10.3 (279)                    | 9.3 (122)                    | 11.1 (157)                     |                |

\*Age in years. 'Categorical variables tested using Chi-squared, continuous various tested using Wilcoxon.

**Table S2. Description of sample population by age group (unweighted)**

|                      | <b>Total % (n)<br/>N = 2723</b> | <b>15–19 year olds<br/>(n = 1435)</b> | <b>20–24 year olds<br/>(n = 1288)</b> |                   |
|----------------------|---------------------------------|---------------------------------------|---------------------------------------|-------------------|
| Sex (Male)           | 48.0 (1 307)                    | 49.1 (705)                            | 46.7 (602)                            | 0.213             |
| Location (Urban)     | 49.9 (1 360)                    | 46.6 (669)                            | 53.7 (691)                            | <b>&lt;0.0001</b> |
| Province:            |                                 |                                       |                                       | <b>0.038</b>      |
| – Western Cape       | 5.5 (149)                       | 5.1 (73)                              | 5.9 (76)                              |                   |
| – Eastern Cape       | 13.6 (371)                      | 15.3 (219)                            | 11.8 (152)                            |                   |
| – Northern Cape      | 7.3 (200)                       | 7.5 (107)                             | 7.2 (93)                              |                   |
| – Free State         | 9.9 (270)                       | 10.1 (145)                            | 9.7 (125)                             |                   |
| – Kwa-Zulu Natal     | 18 (489)                        | 18.2 (261)                            | 17.7 (228)                            |                   |
| – North West         | 8.9 (242)                       | 7.7 (111)                             | 10.2 (131)                            |                   |
| – Gauteng            | 8.5 (231)                       | 7.4 (106)                             | 9.7 (125)                             |                   |
| – Mpumalanga         | 12.4 (338)                      | 12.4 (178)                            | 12.4 (160)                            |                   |
| – Limpopo            | 15.9 (433)                      | 16.4 (235)                            | 15.4 (198)                            |                   |
| Education level      |                                 |                                       |                                       | <b>&lt;0.0001</b> |
| – Primary or less    | 10.4 (283)                      | 13.2 (190)                            | 7.2 (93)                              |                   |
| – Secondary complete | 84.1 (2289)                     | 86 (1234)                             | 81.9 (1055)                           |                   |
| – Tertiary           | 5.6 (151)                       | 0.8 (11)                              | 10.9 (140)                            |                   |
| Employed             | 13.2 (358)                      | 3.5 (50)                              | 23.9 (308)                            | <b>&lt;0.0001</b> |
| Wealth index         |                                 |                                       |                                       | 0.205             |

|                        |            |            |            |  |
|------------------------|------------|------------|------------|--|
| – Quintile 1 (Poorest) | 23.3 (634) | 24.9 (357) | 21.5 (277) |  |
| – Quintile 2 (Poorer)  | 23.5 (640) | 22.2 (318) | 25 (322)   |  |
| – Quintile 3 (Middle)  | 23.1 (630) | 22.9 (328) | 23.5 (302) |  |
| – Quintile 4 (Richer)  | 19.8 (540) | 19.7 (282) | 20 (258)   |  |
| – Quintile 5 (Richest) | 10.3 (279) | 10.5 (150) | 10 (129)   |  |

\*Variables tested using Chi-squared.

**Table S3. Prevalence of single disease conditions by sex and method of measurement in South Africa for 2016 (weighted data)**

| Disease condition                   |                        | Total %(95% CI)         | Male %(95% CI)          | Female %(95% CI)           |
|-------------------------------------|------------------------|-------------------------|-------------------------|----------------------------|
| <b>Self-reported</b>                | Diabetes               | 0.22 (0.09–0.52)        | 0.25 (0.07–0.89)        | 0.18 (0.07–0.45)           |
|                                     | Bronchitis/COPD        | 0.27 (0.14–0.53)        | 0.14 (0.03–0.55)        | 0.43 (0.2–0.91)            |
|                                     | Heart disease          | 0.51 (0.29–0.88)        | 0.28 (0.12–0.67)        | 0.77 (0.38–1.54)           |
|                                     | High cholesterol       | 0.47 (0.2–1.09)         | 0.12 (0.03–0.48)        | 0.89 (0.35–2.27)           |
|                                     | Stroke                 | 0.1 (0.04–0.28)         | 0.07 (0.01–0.51)        | 0.14 (0.04–0.41)           |
|                                     | TB (in past 12 months) | 0.47 (0.26–0.84)        | 0.45 (0.2–1.01)         | 0.5 (0.22–1.13)            |
| <b>Measured</b>                     | <b>HIV</b>             | <b>8.37 (6.8–10.27)</b> | <b>3.73 (2.35–5.87)</b> | <b>13.71 (10.88–17.15)</b> |
|                                     | Hypertension           | 18.56 (16.33–21.03)     | 20.24 (17.44–23.36)     | 16.62 (13.54–20.24)        |
|                                     | Anaemia                | 23.27 (20.98–25.73)     | 13.26 (10.6–16.46)      | 34.38 (30.68–38.27)        |
|                                     | Diabetes               | 1.61 (1.04–2.49)        | 1.98 (1.1–3.55)         | 1.19 (0.68–2.09)           |
| <b>Self-reported &amp; measured</b> | Diabetes               | 1.18 (0.78–1.76)        | 1.47 (0.85–2.51)        | 0.83 (0.49–1.41)           |

**Table S4. Prevalence of single disease conditions by age group and method of measurement in South Africa for 2016 (weighted data)**

| Disease condition                   |                        | Total %(95% CI)         | 15–19 year old<br>%(95% CI) | 20–24 year olds<br>%(95% CI) |
|-------------------------------------|------------------------|-------------------------|-----------------------------|------------------------------|
| <b>Self-reported</b>                | Diabetes               | 0.22 (0.09–0.52)        | 0.19 (0.04–0.92)            | 0.24 (0.1–0.6)               |
|                                     | Bronchitis/COPD        | 0.27 (0.14–0.53)        | 0.34 (0.14–0.82)            | 0.2 (0.07–0.54)              |
|                                     | Heart disease          | 0.51 (0.29–0.88)        | 0.37 (0.12–1.14)            | 0.65 (0.37–1.14)             |
|                                     | High cholesterol       | 0.47 (0.2–1.09)         | 0.2 (0.06–0.65)             | 0.76 (0.27–2.11)             |
|                                     | Stroke                 | 0.1 (0.04–0.28)         | 0.04 (0.01–0.19)            | 0.17 (0.05–0.55)             |
|                                     | TB (in past 12 months) | 0.47 (0.26–0.84)        | 0.35 (0.14–0.91)            | 0.6 (0.28–1.25)              |
| <b>Measured</b>                     | <b>HIV</b>             | <b>8.37 (6.8–10.27)</b> | <b>5.65 (4–7.93)</b>        | <b>11.36 (8.75–14.63)</b>    |
|                                     | Hypertension           | 18.56 (16.33–21.03)     | 12.74 (10.46–15.41)         | 24.83 (21.21–28.84)          |
|                                     | Anaemia                | 23.27 (20.98–25.73)     | 25.01 (21.9–28.4)           | 21.38 (17.73–25.55)          |
|                                     | Diabetes               | 1.61 (1.04–2.49)        | 1.3 (0.73–2.29)             | 1.96 (1.08–3.51)             |
| <b>Self-reported &amp; measured</b> | Diabetes               | 1.18 (0.78–1.76)        | 1.47 (0.85–2.51)            | 0.83 (0.49–1.41)             |

**Table S5. Number of diseases in individuals by age group in South Africa for 2016 (weighted data)**

| Number of diseases                   | Total %<br>(95% CI)     | 15–19 year olds %<br>(95% CI) | 20–24 year olds %<br>(95% CI) |
|--------------------------------------|-------------------------|-------------------------------|-------------------------------|
| No disease                           | 69.64 (67.11–72.05)     | 71.62 (68.55–74.51)           | 67.53 (63.66–71.18)           |
| 1 disease                            | 25.13 (23.04–27.35)     | 25.36 (22.51–28.44)           | 24.89 (22.04–27.97)           |
| 2 diseases                           | 4.14 (3.37–5.07)        | 2.77 (1.99–3.84)              | 5.6 (4.26–7.33)               |
| 3 diseases                           | 1.09 (0.65–1.81)        | 0.25 (0.1–0.68)               | 1.98 (1.12–3.47)              |
| <b>Multimorbidity (≥ 2 diseases)</b> | <b>5.23 (4.25–6.41)</b> | <b>3.02 (2.21–4.11)</b>       | <b>7.58 (5.9–9.67)</b>        |

**Table S6. Number of MEASURED diseases in individuals by age group in South Africa for 2016 (weighted data)**

| Number of diseases                   | Total %<br>(95% CI)     | 15–19 year olds %<br>(95% CI) | 20–24 year olds %<br>(95% CI) |
|--------------------------------------|-------------------------|-------------------------------|-------------------------------|
| No disease                           | 70.71 (68.20–73.10)     | 72.72 (69.67–75.57)           | 68.57 (64.71–72.2)            |
| 1 disease                            | 24.55 (22.46–26.76)     | 24.62 (21.79–27.68)           | 24.48 (21.65–27.55)           |
| <b>Multimorbidity (≥ 2 diseases)</b> | <b>4.47 (3.79–5.92)</b> | <b>2.66 (1.92–3.68)</b>       | <b>6.95 (5.31–9.04)</b>       |

Note: MM here is defined as only measured disease (i.e. self-reported is excluded).

**Table S7. Number of diseases in individuals by sex in South Africa for 2016 (weighted data)**

| Number of diseases                   | Total %<br>(95% CI)     | Male %<br>(95% CI)      | Female %<br>(95% CI)    |
|--------------------------------------|-------------------------|-------------------------|-------------------------|
| No disease                           | 69.64 (67.11–72.05)     | 74.97 (71.79–77.9)      | 63.34 (60–66.56)        |
| 1 disease                            | 25.13 (23.04–27.35)     | 22.6 (19.9–25.55)       | 28.12 (25.26–31.17)     |
| 2 diseases                           | 4.14 (3.37–5.07)        | 2.28 (1.52–3.42)        | 6.33 (4.96–8.04)        |
| 3 diseases                           | 1.09 (0.65–1.81)        | 0.15 (0.04–0.52)        | 2.2 (1.2–3.80)          |
| <b>Multimorbidity (≥ 2 diseases)</b> | <b>5.23 (4.25–6.41)</b> | <b>2.43 (1.65–3.58)</b> | <b>8.53 (6.65–10.9)</b> |

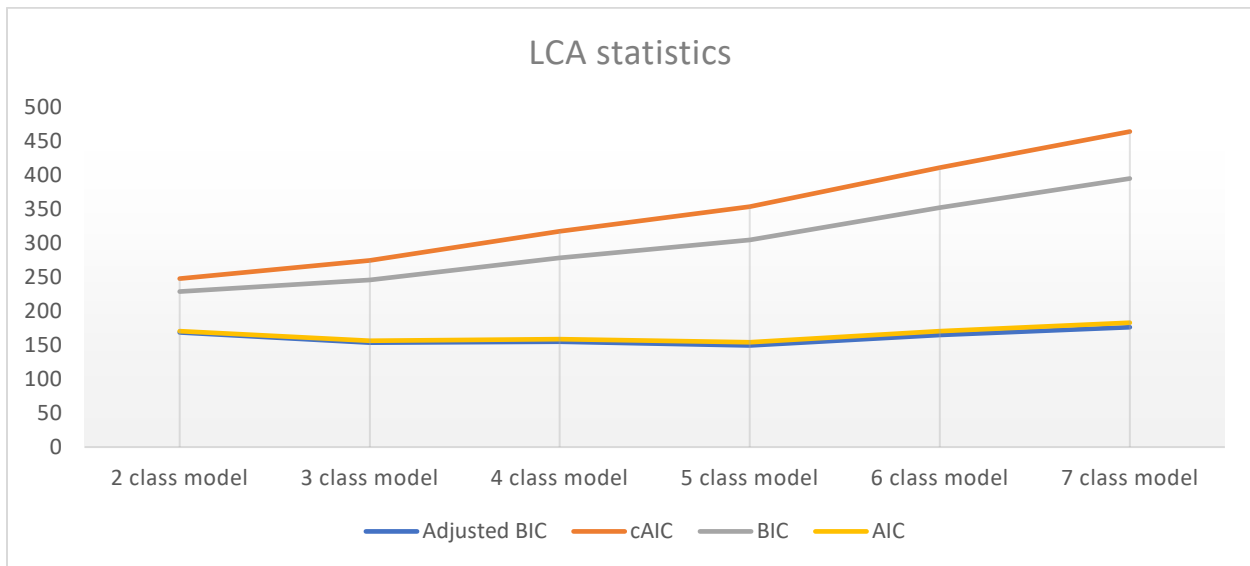

**Figure S1. LCA statistics**

Table S8. Item response probabilities, by disease for each class

| Class   | Class name                  | Item response probability |            |               |             |             |               |              |        |     |
|---------|-----------------------------|---------------------------|------------|---------------|-------------|-------------|---------------|--------------|--------|-----|
|         |                             | HIV                       | Diabetes   | Hyper-tension | Anae-mia    | Bronch-itis | Heart disease | Choles-terol | Stroke | TB  |
| Class 1 | Diabetes, Anaemia           | 34%                       | <b>97%</b> | 35%           | <b>71%</b>  | 0%          | 0%            | 0%           | 0%     | 5%  |
| Class 2 | HIV, Anaemia                | <b>100%</b>               | 0%         | 37%           | <b>100%</b> | 0%          | 6%            | 0%           | 0%     | 1%  |
| Class 3 | HIV, Hypertension           | <b>100%</b>               | 0%         | <b>97%</b>    | 16%         | 0%          | 0%            | 0%           | 0%     | 8%  |
| Class 4 | Hypertension, Anaemia       | 2%                        | 0%         | <b>100%</b>   | <b>100%</b> | 0%          | 0%            | 15%          | 0%     | 0%  |
| Class 5 | Hypertension, Heart disease | 12%                       | 8%         | <b>68%</b>    | <b>36%</b>  | 22%         | <b>41%</b>    | 14%          | 18%    | 18% |
